# Supplementary material for: Ultra-responsive soft matter from strain-stiffening hydrogels
Source: PubMed Central journal article supplement (PMC4275588; doi:10.1038/ncomms6808), 2014-12-16
Supplement: ncomms6808-s1.pdf [file ncomms6808-s1.pdf]

## SUPPLEMENTARY MATERIAL

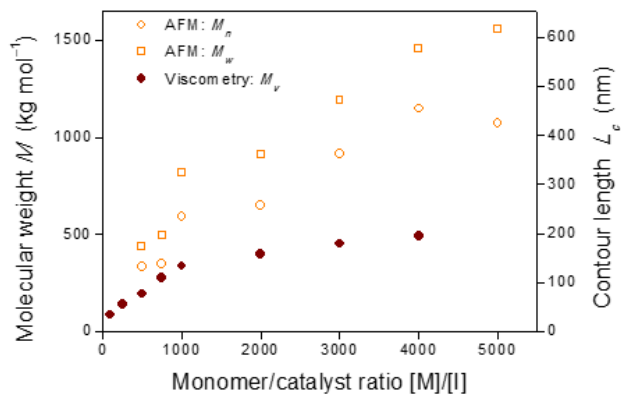

**Supplementary Figure 1 | Molecular weight of the polymers as a function of the monomer/catalyst ratio used during the polymerization reaction.** Solid dots correspond to  $M_v$ , determined by viscometry, open dots and squares correspond to  $M_n$  and  $M_w$  respectively, determined by AFM imaging.

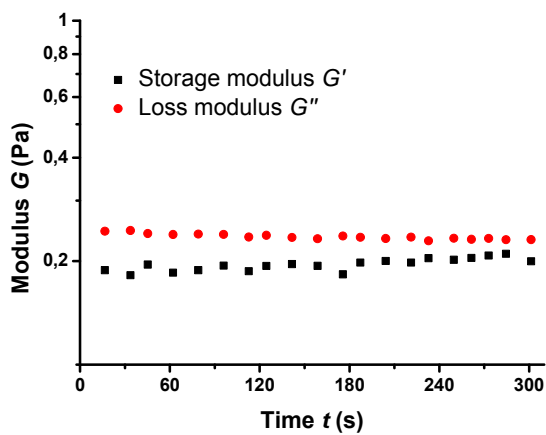

**Supplementary Figure 2 | Linear regime of a 1f hydrogel at  $T = 17^\circ\text{C}$ .** Recorded at a frequency of 1 Hz and a strain of 4%.

**P1a:**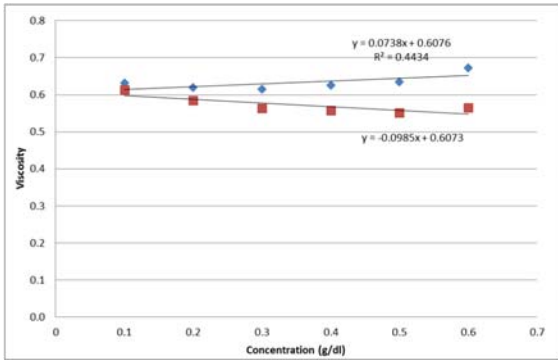**P1b:**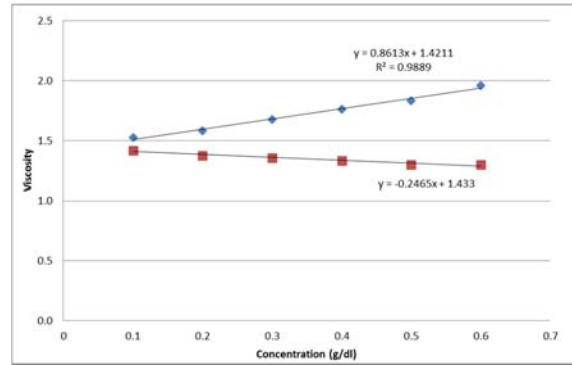**P1c:**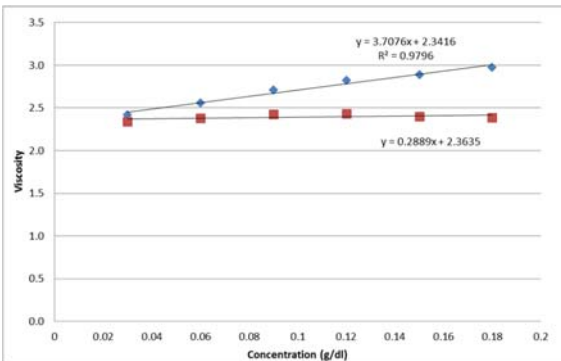**P1d:**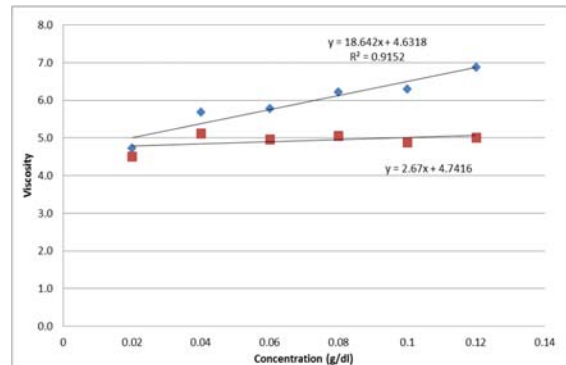**P1e:**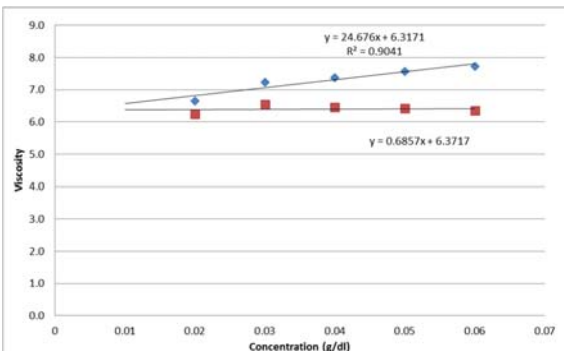**P1f:**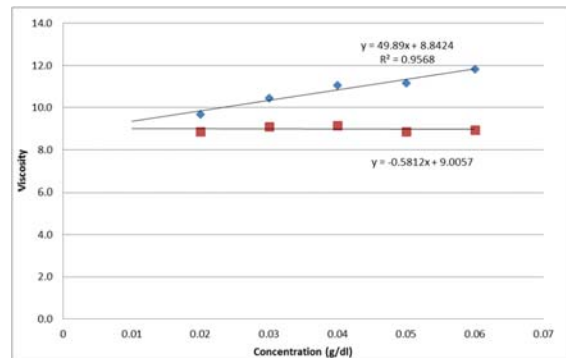**P1g:**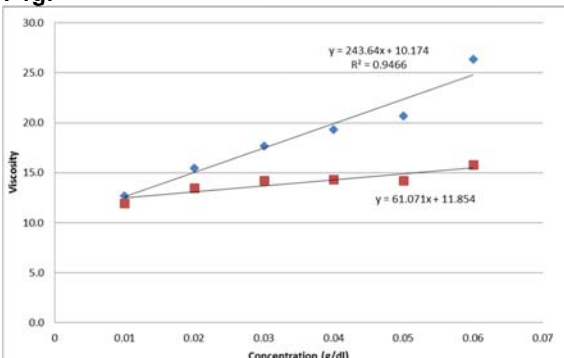

**Supplementary Figure 3 | Viscometry data of P1a-P1g.** Blue diamonds represent the reduced viscosity and red squares represent the inherent viscosity. The intrinsic viscosity was obtained from extrapolation to  $c = 0$  g/dL. From the intrinsic viscosity,  $M_v$  was calculated using the Mark-Houwink equation with  $K$  and  $a$  values of  $1.4 \cdot 10^{-9}$  and 1.75, respectively.
